# Supplementary material for: Which resources help young people to prevent and overcome mental distress in deprived urban areas in Latin America? A protocol for a prospective cohort study
Source: PubMed Central journal article supplement (PMC8438828; doi:10.1136/bmjopen-2021-052339), 2021-09-13
Supplement: bmjopen-2021-052339supp001.pdf [file bmjopen-2021-052339supp001.pdf]

## Supplementary File 1: Schedule of assessments for the cross-sectional and longitudinal studies

| Item measured                         | Scale/ assessment method                                                         | Description of scale                                                                                | Baseline | 6-month follow-up | 12-month follow-up |
|---------------------------------------|----------------------------------------------------------------------------------|-----------------------------------------------------------------------------------------------------|----------|-------------------|--------------------|
| <b>DEMOGRAPHICS</b>                   |                                                                                  |                                                                                                     |          |                   |                    |
| Demographics                          | Current living situation                                                         | Includes variables like gender, age, education level etc                                            | X        |                   | X*                 |
|                                       | History of depression and anxiety                                                | Participants' and their parents' experiences of mental distress and treatment received              | X        |                   | X*                 |
| <b>MEASURES OF MENTAL DISTRESS</b>    |                                                                                  |                                                                                                     |          |                   |                    |
| Degree of distress                    | Patient Health Questionnaire-8 (PHQ-8)                                           | Measures degree of experiencing a list of symptoms associated with depression                       | X        | X                 | X                  |
|                                       | Generalised Anxiety Disorder-7 (GAD-7)                                           | Measures degree of experiencing a list of symptoms associated with anxiety                          | X        | X                 | X                  |
| Drug use                              | The Alcohol, Smoking and Substance Involvement Screening Test (ASSIST) - adapted | Measures drug use in the lifetime and last 3 months                                                 | X        |                   | X                  |
|                                       | Adapted Teen Addiction Severity Index (T-ASI) - adapted                          | Measures drug use including alcohol use and severity                                                | X        |                   | X                  |
| Life events                           | Adolescent appropriate life events scale - adapted                               | Captures experience of life events in their lifetime and in the last year or six month respectively | X        | X                 | X                  |
| <b>MEASURES OF RESOURCES</b>          |                                                                                  |                                                                                                     |          |                   |                    |
| General resources                     | Open question                                                                    | What participants do when they feel mentally distressed                                             | X        |                   | X                  |
| Impact of COVID-19                    | Closed questions                                                                 | Brief assessment of how COVID-19 has impacted on various activities                                 | X        | TBC               | TBC                |
| <b>MEASURES OF PERSONAL RESOURCES</b> |                                                                                  |                                                                                                     |          |                   |                    |
| Quality of life                       | Manchester Short Assessment of Quality of Life (MANSA)                           | Measures perception of how satisfied they are with different aspects of their lives                 | X        |                   | X                  |
| Sex life                              | Closed question                                                                  | Whether they have had sex with another person in the last month                                     | X        |                   | X                  |
| Coping style                          | Child's Coping Strategy Checklist                                                | Measures how individuals deal with problems and stress                                              | X        |                   | X                  |
| Resilience                            | Connor-Davidson Resilience Scale (CD-RISC 10)                                    | Measures resilience in response to stressful events, tragedy or trauma                              | X        |                   | X                  |
| <b>MEASURES OF SOCIAL RESOURCES</b>   |                                                                                  |                                                                                                     |          |                   |                    |
| Use of healthcare and other services  | Client Service Receipt Inventory (CSRI) - adapted                                | Measures frequency of use of healthcare and social services                                         | X        | X                 | X                  |
| Social support                        | Scale of Perceived Social Support                                                | Measures perception of social support network                                                       | X        |                   | X                  |

|                               |                                                          |                                                                                                                                        |   |  |   |
|-------------------------------|----------------------------------------------------------|----------------------------------------------------------------------------------------------------------------------------------------|---|--|---|
| Social capital                | Adapted Social Capital Assessment Tool (ASCAT) - adapted | Asks about perceptions of and engagement with community groups                                                                         | X |  | X |
| Family support                | Open questions                                           | Asks which family member they speak to about feelings and emotions, and which family members speak to them about feelings and emotions | X |  | X |
| <b>MEASURES OF ACTIVITIES</b> |                                                          |                                                                                                                                        |   |  |   |
| Sports activity               | Open/closed questions                                    | Asks about sports activities including frequency of participation and the nature of these activities                                   | X |  | X |
| Arts activity                 | Open/closed questions                                    | Asks about arts activities including frequency of participation and the nature of these activities                                     | X |  | X |
| Internet use                  | Question 59 from REACH study - adapted                   | Measures internet use via agreement with a list of statements                                                                          | X |  | X |

*Legend:**X: questionnaire included**X\*: various items included (e.g. only sociodemographic items that might have changed will be included)**TBC: to be confirmed depending on the COVID-19 situation in partner countries*
