# Supplementary material for: Which resources help young people to prevent and overcome mental distress in deprived urban areas in Latin America? A protocol for a prospective cohort study
Source: BMJ Open. 2021 Sep 13;11(9):e052339. doi: 10.1136/bmjopen-2021-052339 (PMC8438828; doi:10.1136/bmjopen-2021-052339)
Supplement: Supplementary data [file bmjopen-2021-052339supp002.pdf]

**Supplementary File 2: Summary of questions that form the ESM assessment**

| Item measured | Question                                                                                    | Description                                                                                                                                                                      |
|---------------|---------------------------------------------------------------------------------------------|----------------------------------------------------------------------------------------------------------------------------------------------------------------------------------|
| Location      | Where are you now?                                                                          | 1 item asking participants to state their location. Participants choose from predefined categories or select “other” and provide more detail                                     |
| Activity      | What are you doing now?<br>Time spent doing this activity since last “beep” (notification)? | 1 open question asking participants what they are doing (main activity)<br>1 item asking the participants to indicate time spent doing this activity since the last notification |
| Company       | Who are you doing this activity with?                                                       | 1 item asking participants to state who they are doing their main activity with. Participants choose from predefined categories or select “other” and provide more detail.       |
| Affect        | How are you feeling now?                                                                    | 1 item asks participants to rate how they are feeling on a 7-point Likert scale ranging from 1 (“extremely unhappy”) to 7 (“extremely happy”)                                    |
| Arousal       | How nervous or relaxed are you now?                                                         | 1 item asking participants to rate how nervous/relaxed they are feeling on a 7-point Likert scale ranging from 1 “very nervous” to 7 “very relaxed”                              |
